# Supplementary material for: Genome Evolution in Three Species of Cactophilic Drosophila
Source: PubMed Central journal article supplement (PMC5068933; doi:10.1534/g3.116.033779), 2016-08-03

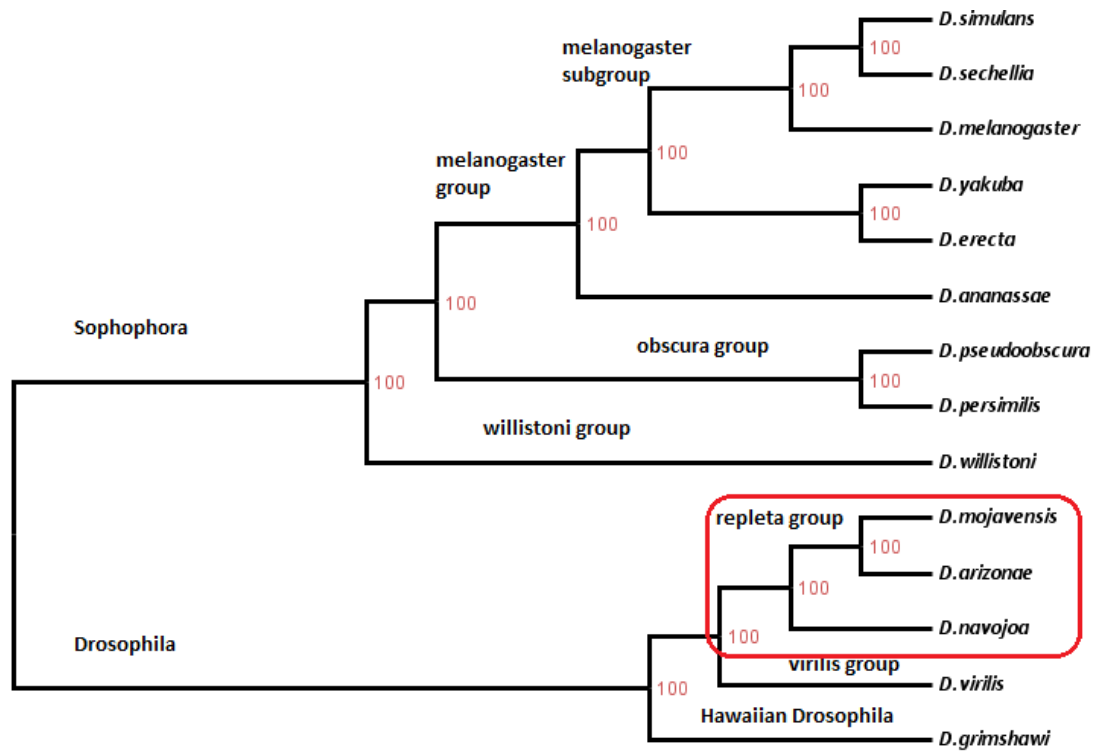

Supplement: supp_g3.116.033779_FigureS1.pdf [file supp_g3.116.033779_FigureS1.pdf]
