# Supplementary material for: Genome Evolution in Three Species of Cactophilic Drosophila
Source: PubMed Central journal article supplement (PMC5068933; doi:10.1534/g3.116.033779), 2016-08-03
Supplement: supp_g3.116.033779_TableS1.pdf [file supp_g3.116.033779_TableS1.pdf]

**Table S1.** Average synonymous (dS) and nonsynonymous (dN) substitutions per site and dN/dS ratios for coding genes in the inverted and collinear Muller elements in *Drosophila arizonae* (ar), *D. mojavensis* (mo), and *D. navojoa* (na).

| Element   | dN     |        |        | dS     |        |        | dN/dS |       |       |
|-----------|--------|--------|--------|--------|--------|--------|-------|-------|-------|
|           | ar-mo  | ar-na  | mo-na  | ar-mo  | ar-na  | mo-na  | ar-mo | ar-na | mo-na |
| Inverted  | 0.011↑ | 0.028↑ | 0.028↑ | 0.066↑ | 0.166↑ | 0.167↑ | 0.156 | 0.145 | 0.146 |
| Collinear | 0.008  | 0.022  | 0.023  | 0.056  | 0.151  | 0.150  | 0.161 | 0.139 | 0.143 |

↑ Inverted chromosomes with higher divergence levels than collinear chromosomes (Mann-Whitney test;  $p < 0.05$ ).
