# Supplementary material for: Genome Evolution in Three Species of Cactophilic Drosophila
Source: PubMed Central journal article supplement (PMC5068933; doi:10.1534/g3.116.033779), 2016-08-03
Supplement: supp_g3.116.033779_TableS2.pdf [file supp_g3.116.033779_TableS2.pdf]

**Table S2.** Divergence dates (Ma) for *Drosophila arizonae*, *D. navojoa* and *D. mojavenensis*. Comparisons between present and previous studies for *Drosophila* species. Ranges in parentheses.

| <b>Nodes</b>     | <b>Russo<br/><i>et al</i><sup>a</sup></b> | <b>Matzkin<br/><i>et al</i><sup>a</sup></b> | <b>Obbard<br/><i>et al</i><sup>b</sup></b> | <b>Present study</b> |
|------------------|-------------------------------------------|---------------------------------------------|--------------------------------------------|----------------------|
| <b>Dvir-Dnav</b> | 32 (26 - 38)                              | -----                                       | 47 (21- 79)                                | 31.13 (25 - 37)      |
| <b>Dnav-Dmoj</b> | -----                                     | 3.8 (3.2 - 4.4)                             | -----                                      | 5.86 (4 - 7)         |
| <b>Dmoj-Dari</b> | 4.2 (2.22 -<br>6.18)                      | 2.4 (1 - 3.8)                               | -----                                      | 1.51 (1.1 – 1.9)     |

<sup>a</sup> Estimates based on Adh gene.

<sup>b</sup> Estimate based on Hawaiian *Drosophila* calibrations.
