# Supplementary material for: Genome Evolution in Three Species of Cactophilic Drosophila
Source: PubMed Central journal article supplement (PMC5068933; doi:10.1534/g3.116.033779), 2016-08-03
Supplement: supp_g3.116.033779_TableS4.pdf [file supp_g3.116.033779_TableS4.pdf]

**Table S4.** Number of protein coding genes used in the dN, dS comparisons for each Muller element.

|                 | Darizonae-Dmojavensis | Darizonae-Dnavojoa | Dmojavensis-Dnavojoa |
|-----------------|-----------------------|--------------------|----------------------|
| MullerA         | 1086                  | 1230               | 1228                 |
| MullerB         | 416                   | 478                | 478                  |
| MullerE         | 1238                  | 1348               | 1365                 |
| Total inverted  | 2740                  | 3056               | 3071                 |
| MullerC         | 1025                  | 1166               | 1167                 |
| MullerD         | 1057                  | 1211               | 1216                 |
| Total collinear | 2082                  | 2377               | 2383                 |
